# Supplementary material for: Structures and luminescent properties of a series of Ln–Ag heterometallic coordination polymers
Source: Royal Society of Chemistry journal article supplement (doi:10.1039/b900430k), 2009-01-01
Supplement: b900430k.pdf [file b900430k.pdf]

## **Structures and Luminescent Properties of a Series of Ln-Ag**

### **Heterometallic Coordination Polymers**

*Xiao-Qing Zhao, Bin Zhao,\* Wei Shi, Peng Cheng\**

*Department of Chemistry, Nankai University, Tianjin 300071, People's Republic of China.*

*Email: [zhaobin@nankai.edu.cn](mailto:zhaobin@nankai.edu.cn), [pcheng@nankai.edu.cn](mailto:pcheng@nankai.edu.cn)*

**Supporting figures**

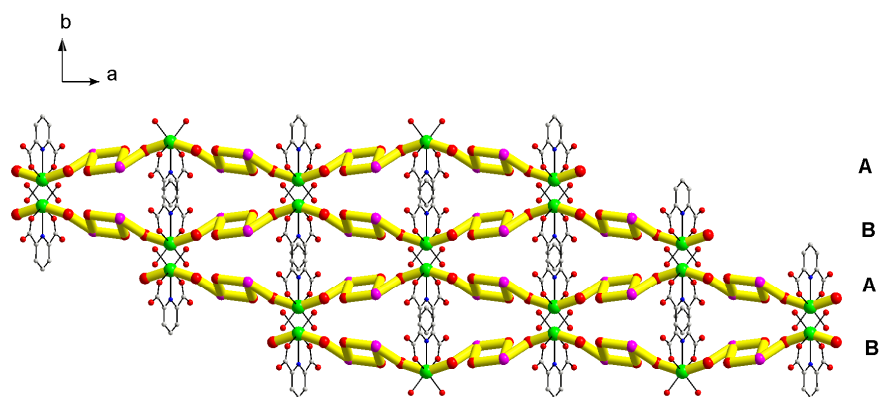

**Figure S1** The packing structure of **8** with ABAB array along *c* axis. Color codes: green, Ce; purple, Ag; red, O; gray, C; blue, N; yellow lines, 1D CeAg<sub>2</sub> chains.

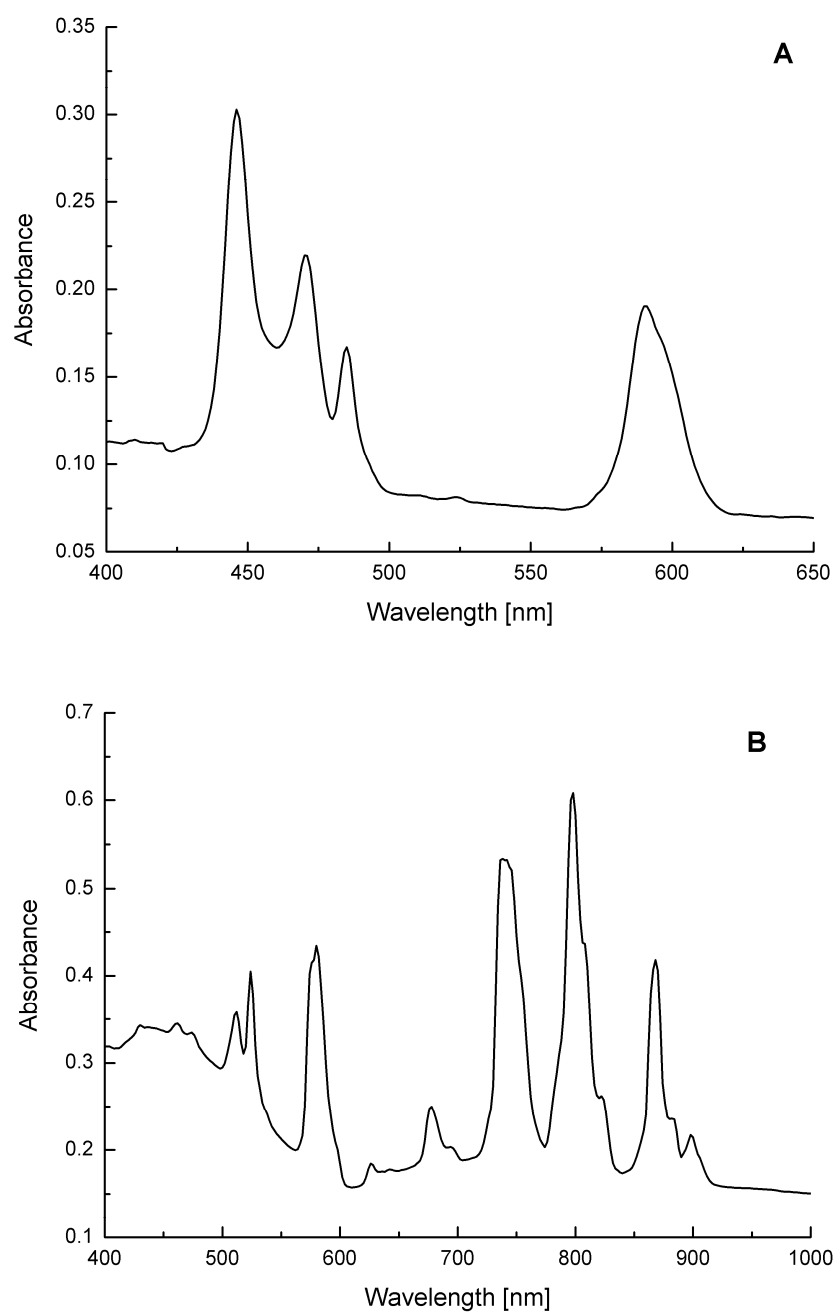

**Figure S2** The UV/Vis absorption spectra of **1** (A) and **3** (B) in the solid state.

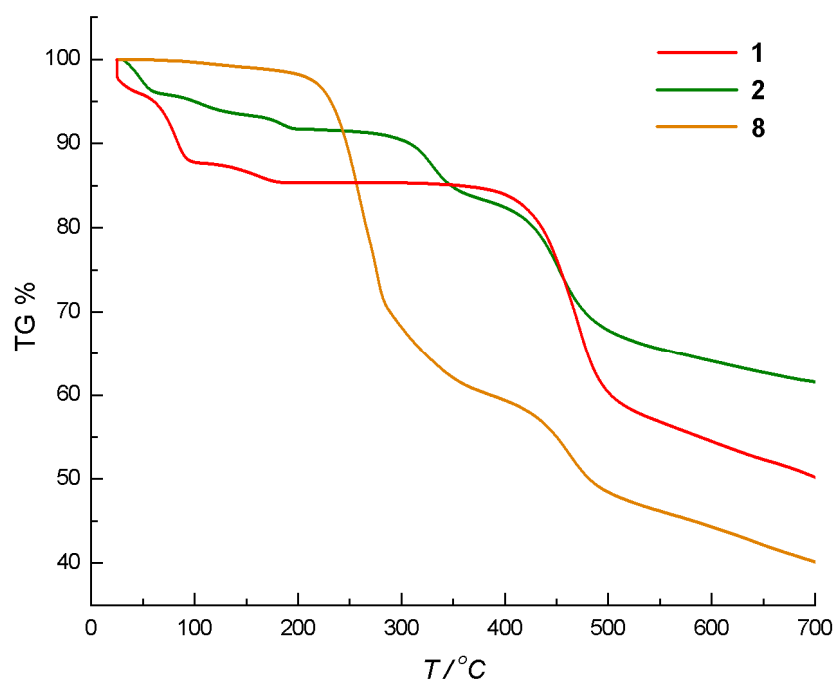

**Figure S3** TGA diagrams for **1**, **2** and **8**.
